# Supplementary material for: Flame-retardant single-ion conducting polymer electrolytes based on anion acceptors for high-safety lithium metal batteries
Source: Royal Society of Chemistry journal article supplement (doi:10.1039/d0ta12437k), 2021-01-01
Supplement: d0ta12437k1.pdf [file d0ta12437k1.pdf]

## Supporting Information

### **Flame-retardant single-ion conducting polymer electrolytes based on anion acceptors for high-safety lithium metal batteries**

*Kuirong Deng<sup>1\*</sup>, Tianyu Guan<sup>1</sup>, Fuhui Liang<sup>1</sup>, Xiaoqiong Zheng<sup>1</sup>, Qingguang Zeng<sup>1</sup>, Zheng Liu<sup>1</sup>, Guangxia Wang<sup>1</sup>, Zhenping Qiu<sup>1</sup>, Yangfan Zhang<sup>2</sup>, Min Xiao<sup>3</sup>, Yuezhong Meng<sup>3\*</sup>, Lai Wei<sup>4</sup>*

<sup>1</sup> School of Applied Physics and Materials, Wuyi University, Jiangmen 529020, P. R. China.

<sup>2</sup> School of Textile Materials and Engineering, Wuyi University, Jiangmen 529020, P. R. China.

<sup>3</sup> The Key Laboratory of Low-carbon Chemistry & Energy Conservation of Guangdong Province /State Key Laboratory of Optoelectronic Materials and Technologies, School of Materials Science and Engineering, Sun Yat-sen University, Guangzhou 510275, P. R. China.

<sup>4</sup> *Hangzhou Yanqu Information Technology Co., Ltd., Hangzhou 310012, China*

\*Corresponding authors:

E-mail: dengkuir@mail2.sysu.edu.cn (Kuirong Deng)

E-mail: mengyzh@mail.sysu.edu.cn (Yuezhong Meng)

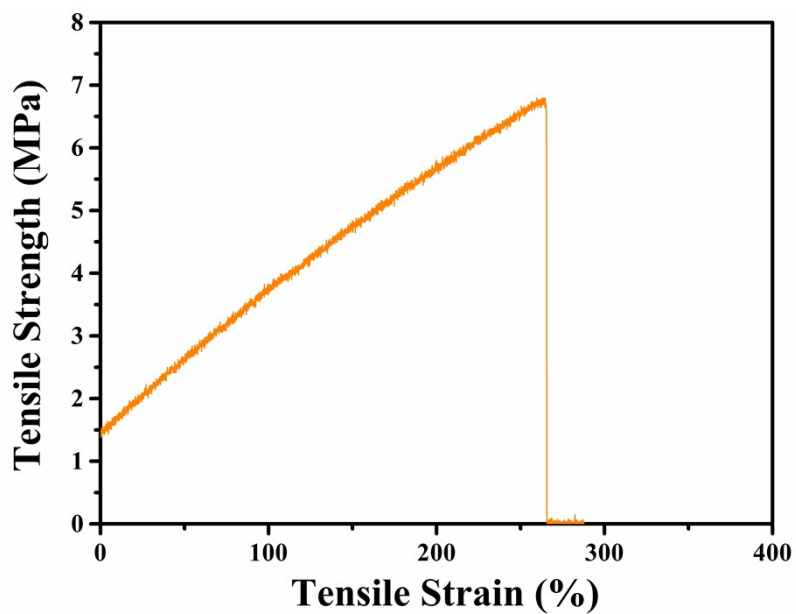

**Fig. S1** Stress-strain curve of AEP membrane.

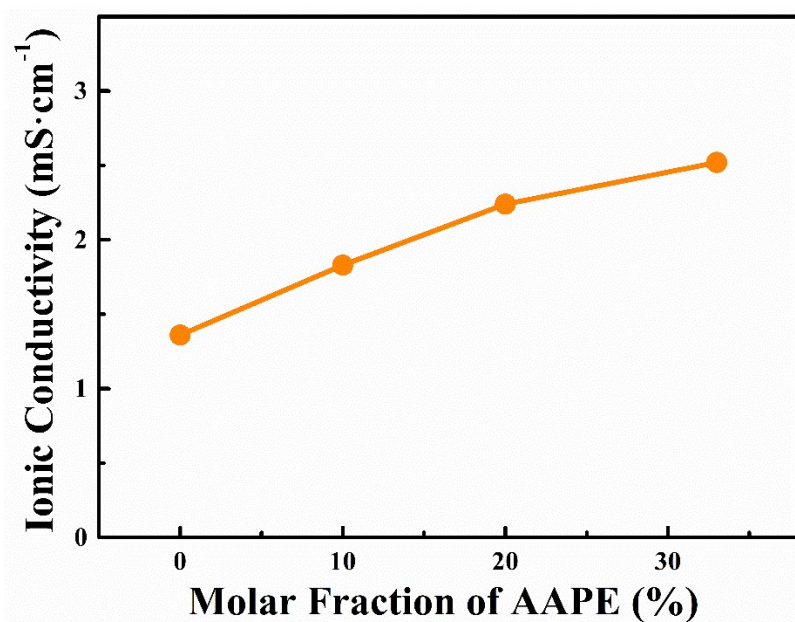

**Fig. S2** Influence of molar fraction of AAPE in monomers (AAPE, ETT and PTM) on ionic conductivity of AEP at 25 °C.

**Table S1** Summary of current single-ion conducting polymer electrolytes

| Electrolyte                    | Flammability              | $\sigma^a$ (S cm <sup>-1</sup> ) | Battery type | Cycles (capacity retention) |
|--------------------------------|---------------------------|----------------------------------|--------------|-----------------------------|
| <b>AEP (this work)</b>         | Nonflammable              | $2.52 \times 10^{-3}$            | LFP/Li       | 500 (93.2%)                 |
| Po-PBSB <sup>1</sup>           | Nonflammable <sup>b</sup> | $6.2 \times 10^{-4}$             | LFP/Li       | 200 (76.1%)                 |
| SICE <sup>2</sup>              | Nonflammable <sup>b</sup> | $8.3 \times 10^{-4}$             | LFP/Li       | 800 (92.9%)                 |
| es-LiPCE-s <sup>3</sup>        | Flammable                 | $2.52 \times 10^{-3}$            | LFP/Li       | 1500 (83.1%)                |
| PSMA-g-LiATFSI <sup>4</sup>    | Flammable                 | $1.6 \times 10^{-4}$             | LFP/Li       | 1000 (-)                    |
| PEGDM-LiMTFSI <sup>5</sup>     | Flammable                 | $1.2 \times 10^{-4}$             | LFP/Li       | 100 (98%)                   |
| LPD@PVDF <sup>6</sup>          | Flammable                 | $1.32 \times 10^{-3}$            | LFP/Li       | 380 (91%)                   |
| PVDF-HFP/SG <sup>7</sup>       | Flammable                 | $7.2 \times 10^{-4}$             | LFP/Li       | -                           |
| PLTB@PVDF-HFP <sup>8</sup>     | Flammable                 | $1.8 \times 10^{-4}$             | LMO/Li       | 100 (76.9%)                 |
| LiBAMB-PETMP/GBL <sup>9</sup>  | Flammable                 | $1.47 \times 10^{-3}$            | LFP/Li       | 500 (91.2%)                 |
| LiPBIE <sup>10</sup>           | Flammable                 | $5.2 \times 10^{-4}$             | LFP/Li       | 100 (100%)                  |
| PVDF-HFP/LiPSIPA <sup>11</sup> | Flammable                 | $3.7 \times 10^{-4}$             | LFP/Li       | 10 (84%)                    |
| PVDF-HFP/PTF-Li <sup>12</sup>  | Flammable                 | $6.3 \times 10^{-4}$             | LFP/Li       | 7 (95%)                     |
| MTF-Li/PVDF-HFP <sup>13</sup>  | Flammable                 | $6 \times 10^{-4}$               | LFP/Li       | -                           |

<sup>a</sup> Ionic conductivity at room temperature. <sup>b</sup> The dry membranes without plasticizers can't be ignited.

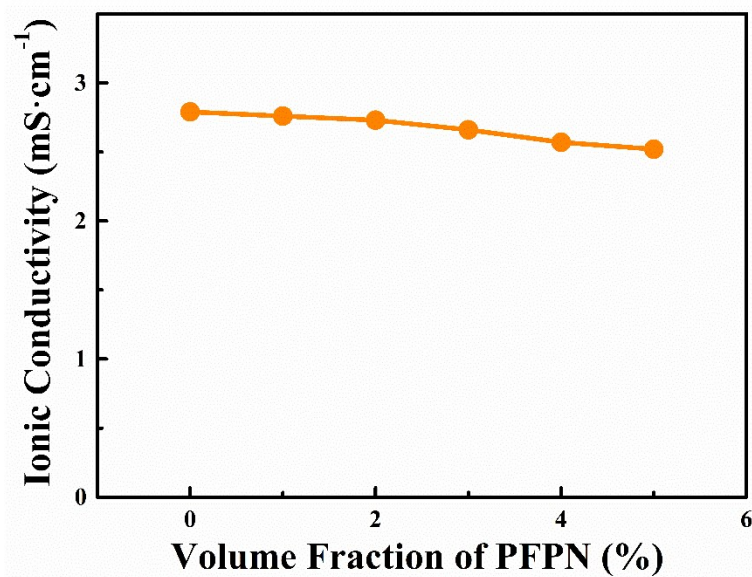

**Fig. S3** Influence of volume fraction of PFPN in EC/FEC/PFPN on ionic conductivity of AEP at 25 °C.

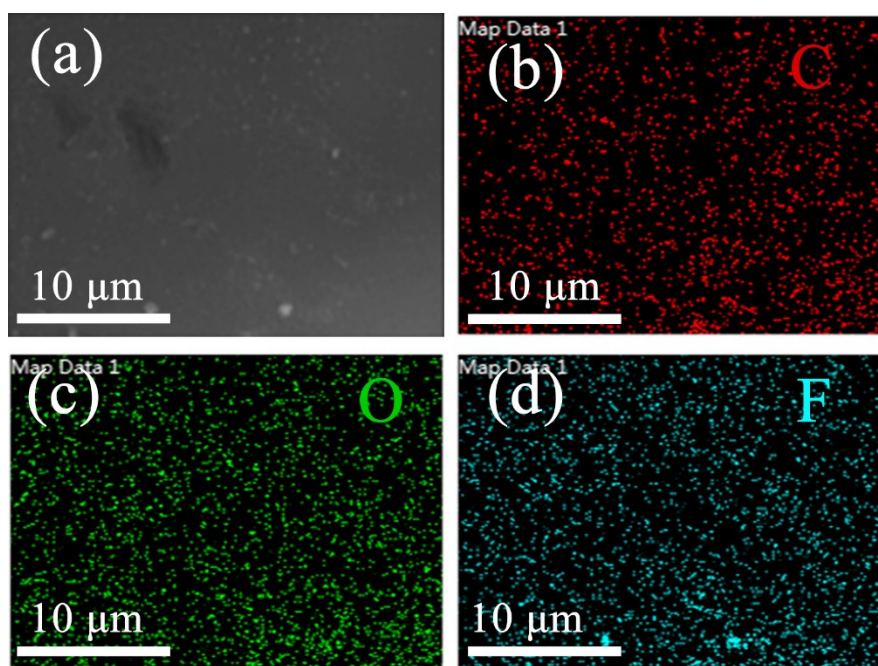

**Fig. S4** (a) SEM image of Li electrodes after 5 cycles in Li|AEP|Li cells; (b) Corresponding EDS mapping of C element; (c) Corresponding EDS mapping of O element; (d) Corresponding EDS mapping of F element.

**Table S2** Atomic ratio of elements on the surface of Li from Li|AEP|Li cell and Li|LE|Li cell after Li plating/stripping cycling test

| Electrolyte | F 1s (at.%) | C 1s (at.%) | Li 1s (at.%) | O 1s (at.%) | P 2p (at.%) |
|-------------|-------------|-------------|--------------|-------------|-------------|
| AEP         | 27.37       | 21.80       | 32.76        | 17.28       | 0.78        |
| LE          | 11.14       | 33.59       | 27.41        | 26.86       | 1.01        |

## References

- 1 Y. Zhang, J. Wang, C. Tan, Y. He, Y. Chen, S. Huo, D. Zeng, C. Li and H. Cheng, *J. Membr. Sci.*, 2020, DOI: 10.1016/j.memsci.2020.118921.
- 2 Y. Chen, C. Li, D. Ye, Y. Zhang, H. Bao and H. Cheng, *J. Membr. Sci.*, 2020, DOI: 10.1016/j.memsci.2020.118926.
- 3 Y. He, J. Wang, Y. Zhang, S. Huo, D. Zeng, Y. Lu, Z. Liu, D. Wang and H. Cheng, *J. Mater. Chem. A*, 2020, **8**, 2518-2528.
- 4 D. Du, X. Hu, D. Zeng, Y. Zhang, Y. Sun, J. Li and H. Cheng, *ACS Appl. Energy Mater.*, 2020, **3**, 1128-1138.
- 5 L. Porcarelli, A. S. Shaplov, F. Bella, J. R. Nair, D. Mecerreyes and C. Gerbaldi, *ACS Energy Lett.*, 2016, **1**, 678-682.
- 6 K. Deng, J. Qin, S. Wang, S. Ren, D. Han, M. Xiao and Y. Meng, *Small*, 2018, **14**, 1801420.
- 7 R. Rohan, K. Pareek, Z. Chen, W. Cai, Y. Zhang, G. Xu, Z. Gao and H. Cheng, *J. Mater. Chem. A*, 2015, **3**, 20267-20276.

- 8 B. Qin, Z. Liu, G. Ding, Y. Duan, C. Zhang and G. Cui, *Electrochim. Acta*, 2014, **141**, 167-172.
- 9 K. Deng, S. Wang, S. Ren, D. Han, M. Xiao and Y. Meng, *J. Power Sources*, 2017, **360**, 98-105.
- 10 Y. Chen, Z. Li, X. Liu, D. Zeng, Y. Zhang, Y. Sun, H. Ke and H. Cheng, *J. Membr. Sci.*, 2017, **544**, 47-57.
- 11 Y. Liu, Y. Zhang, M. Pan, X. Liu, C. Li, Y. Sun, D. Zeng and H. Cheng, *J. Membr. Sci.*, 2016, **507**, 99-106.
- 12 R. Rohan, K. Pareek, Z. Chen and H. Cheng, *RSC Adv.*, 2016, **6**, 53140-53147.
- 13 R. Rohan, K. Pareek, W. Cai, Y. Zhang, G. Xu, Z. Chen, Z. Gao, Z. Dan and H. Cheng, *J. Mater. Chem. A*, 2015, **3**, 5132-5139.
